# Supplementary material for: Catalyst screening for electrochemical ammonia synthesis: a critical review
Source: Royal Society of Chemistry journal article supplement (doi:10.1039/d5na01170a), 2026-04-27
Supplement: d5na01170a1.pdf [file d5na01170a1.pdf]

# Supplementary Information for

## Catalyst Screening for Electrochemical Ammonia Synthesis: A Review

**Dominik G. Jammal**\*<sup>1</sup>, Ricardo Bernardino<sup>1</sup>, Nuno Canha<sup>1</sup> Cristina M. Cordas<sup>1, 2</sup>, Rui P.P.L. Ribeiro<sup>1, 2</sup>

<sup>1</sup> HyLab- Green Hydrogen Collaborative Laboratory Sines Central Termoelétrica, Estrada Nacional 120-1, 7520-089, Sines, Portugal

<sup>2</sup> LAQV-Requimte, Department of Chemistry, NOVA School of Science and Technology, NOVA University of Lisbon, Caparica, Portugal

\* Correspondence: dominik.jammal@hylab.pt

### Supporting Information – Selection of Catalytic Systems

The 215 catalytic systems analyzed in this review were systematically compiled from recent review articles to ensure comprehensive and up-to-date coverage of Lithium-mediated, electrochemical, and photo(electro)catalytic nitrogen reduction reactions. The following review publications served as the primary sources for the initial compilation of catalytic systems.<sup>1–7</sup> Each system extracted from these reviews was cross-checked against the original primary literature referenced in the respective tables to verify reported performance metrics, including NH<sub>3</sub> production rates, Faradaic efficiencies, and, where available, catalyst costs. Only systems with consistent and verifiable data were included to ensure reproducibility and reliability.

**Table S 1:** Comprehensive Overview of 215 Catalytic Systems for N<sub>2</sub> Reduction: Production Rates (PR), Faradaic Efficiencies (FE), Catalyst Costs (CC), and combined Performance Scores.

|    | Catalysts              | PR (normalized) | FE (normalized) | Costs | Sum of Points | Review Source |
|----|------------------------|-----------------|-----------------|-------|---------------|---------------|
| 1  | Mo foil                | 0.53            | 1.68            | 5.13  | 7.3           | 1             |
| 2  | Mo rod                 | n/a             | 1.45            | 8.44  | 9.9           | 1             |
| 3  | Cu foil                | 0.8             | 2.71            | 9.83  | 13.3          | 1             |
| 4  | steel cloth            | 2               | 4.15            | 9.89  | 16.0          | 1             |
| 5  | Au-coated carbon paper | 0.57            | 4.15            | 0.5   | 5.2           | 1             |
| 6  | SSC                    | n/a             | 6.49            | 9.89  | 16.4          | 1             |
| 7  | Steel cloth            | 0.5             | 4.56            | 9.89  | 15.0          | 1             |
| 8  | Ag wire                | 0.56            | 1.75            | 8.09  | 10.4          | 1             |
| 9  | Cu wire                | 0.51            | 6.04            | 9.85  | 16.4          | 1             |
| 10 | Mo foil                | 0.57            | 4.33            | 9.66  | 14.6          | 1             |

|    |                                                                           |      |      |      |       |   |
|----|---------------------------------------------------------------------------|------|------|------|-------|---|
| 11 | Mo foil                                                                   | 0.56 | 4.33 | 9.66 | 14.6  | 1 |
| 12 | Ni wire                                                                   | 0.62 | 9.1  | 9.77 | 19.5  | 1 |
| 13 | Ni wire                                                                   | 0.61 | 10   | 9.77 | 20.4  | 1 |
| 14 | Mo foil                                                                   |      | 3.52 | 9.66 | 13.2  | 2 |
| 15 | Ni wire                                                                   | 7    | 9.91 | 9.77 | 26.7  | 2 |
| 16 | Ni wire                                                                   | 10   | 9.64 | 9.77 | 29.4  | 2 |
| 17 | Cu(HBT)                                                                   | 1.5  | 7.57 | 7.23 | 16.3  | 2 |
| 18 | Mo foil                                                                   | n/a  | 6.04 | 9.66 | 15.7  | 2 |
| 19 | Mo foil                                                                   | n/a  | 8.11 | 9.66 | 17.8  | 2 |
| 20 | Mo foil                                                                   | 0.58 | 4.6  | 9.66 | 14.8  | 2 |
| 21 | Cu (HBT)                                                                  | 0.55 | 2.35 | 7.23 | 10.1  | 2 |
| 22 | Cu                                                                        | 3    | 7.21 | 9.85 | 20.1  | 2 |
| 23 | Mo foil                                                                   |      | 8.02 | 9.66 | 17.7  | 2 |
| 24 | Cu wire                                                                   | 0.7  | 4.78 | 9.85 | 15.3  | 2 |
| 25 | Fe                                                                        | 0.52 | 6.22 | 9.88 | 16.6  | 2 |
| 26 | Hollow Cr <sub>2</sub> O <sub>3</sub> microspheres                        | 3.55 | 1.16 | 9.84 | 14.55 | 3 |
| 27 | TiO <sub>2</sub> -GO                                                      | 2.31 | 0.76 | 9.98 | 13.05 | 3 |
| 28 | Fe <sub>2</sub> O <sub>3</sub> nanorods                                   | 2.41 | 0.5  | 9.95 | 12.86 | 3 |
| 29 | Defect-rich MoS <sub>2</sub> nanoflower                                   | 4.03 | 1.33 | 9.98 | 15.34 | 4 |
| 30 | Mo <sub>2</sub> C/NC                                                      | 10   | 1.78 | 9.2  | 20.98 | 4 |
| 31 | V <sub>2</sub> Ctx MXene                                                  | 2    | 0.88 | 2.55 | 5.43  | 4 |
| 32 | NC/BiSAs/TiN/CC                                                           | 9.73 | 3.17 | 9.74 | 22.64 | 4 |
| 33 | JUC-1000                                                                  | 10   | 1.74 | 7    | 18.74 | 5 |
| 34 | Defective UiO-66-NH <sub>2</sub>                                          | 6.89 | 10   | 9.99 | 26.88 | 5 |
| 35 | HT Au@MOF                                                                 | 5.98 | 7.26 | 9.48 | 22.72 | 5 |
| 36 | MoS <sub>2</sub> @ZIF-71                                                  | 1.92 | 3.88 | 8.76 | 14.56 | 5 |
| 37 | Bi <sub>2</sub> V <sub>0.10x</sub> /CeO <sub>2</sub>                      | 3.29 | 1.54 | 9.98 | 14.81 | 3 |
| 38 | B <sub>4</sub> C                                                          | 3.7  | 2.19 | 9.99 | 15.88 | 3 |
| 39 | Nb <sub>2</sub> O <sub>5</sub> nanofiber                                  | 5.78 | 1.44 | 9.95 | 17.17 | 3 |
| 40 | Cr <sub>2</sub> O <sub>3</sub> /CPE                                       | 3.9  | 1.36 | 9.9  | 15.16 | 4 |
| 41 | TA-reduced Au/TiO <sub>2</sub>                                            | 3.08 | 1.31 | 7.57 | 11.96 | 4 |
| 42 | α-Au/CeO <sub>2</sub> -RGO                                                | 1.49 | 1.53 | 7.13 | 10.15 | 3 |
| 43 | Au flowers                                                                | 3.58 | 1.08 | 9.58 | 14.24 | 3 |
| 44 | Mo <sub>2</sub> C@3DUM-C                                                  | 4.18 | 1.46 | 9.8  | 15.44 | 4 |
| 45 | Au/Ti <sub>3</sub> C <sub>2</sub>                                         | 4.19 | 2.46 | 7.41 | 14.06 | 4 |
| 46 | 1T-MoS <sub>2</sub> /Ti <sub>3</sub> C <sub>2</sub>                       | 4.9  | 0.99 | 9.57 | 15.46 | 4 |
| 47 | Cr <sub>3</sub> C <sub>2</sub> @CNFs                                      | 3.38 | 1.36 | 9.99 | 14.73 | 4 |
| 48 | Ti <sub>3</sub> C <sub>2</sub> Tx (T <sub>14</sub> F,OH) MXene nanosheets | 2.96 | 1.44 | 7.52 | 11.92 | 4 |

|    |                                                                                     |       |      |      |        |   |
|----|-------------------------------------------------------------------------------------|-------|------|------|--------|---|
| 49 | Fluorine-free Ti <sub>3</sub> C <sub>2</sub> Tx (T <sub>14</sub> O <sub>2</sub> OH) | 4.96  | 1.42 | 9.8  | 16.18  | 4 |
| 50 | TiO <sub>2</sub> /Ti <sub>3</sub> C <sub>2</sub> Tx                                 | 3.67  | 1.34 | 2.5  | 7.51   | 4 |
| 51 | Hydroxyl-rich Ti <sub>3</sub> C <sub>2</sub> Tx QDs                                 | 8.11  | 1.89 | 2.55 | 12.55  | 4 |
| 52 | Oxygen-vacancy-rich TiO <sub>2</sub> /Ti <sub>3</sub> C <sub>2</sub> Tx             | 4.37  | 2.21 | 6.45 | 13.03  | 4 |
| 53 | Fe-TCPP                                                                             | 3.91  | 2.22 | 9.38 | 15.51  | 5 |
| 54 | OPA-PCN-222(Fe)                                                                     | 1.61  | 2.33 | 6.94 | 10.88  | 5 |
| 55 | Mo <sub>2</sub> N Nanorods                                                          | 10    | 0.9  | 8.6  | 19.5   | 4 |
| 56 | β-FeOOH nanorods                                                                    | 3.31  | 1.15 | 9.99 | 14.45  | 3 |
| 57 | Mo <sub>2</sub> C/C                                                                 | 1.85  | 1.27 | 9.95 | 13.07  | 4 |
| 58 | Mo <sub>3</sub> Fe <sub>3</sub> C                                                   | 10    | 3.44 | 8.9  | 22.34  | 4 |
| 59 | Co3HHTTP2                                                                           | 3.16  | 0.77 | 9.5  | 13.43  | 5 |
| 60 | M@ZIF-Oam                                                                           | 7.37  | 5.35 | 9.5  | 22.22  | 5 |
| 61 | α-FeB <sub>2</sub> PNSs                                                             | 5.32  | 2.28 | 8.29 | 15.89  |   |
| 62 | Ni nanoparticles/V <sub>4</sub> C <sub>3</sub> Tx MXene                             | 3.06  | 2.07 | 2.55 | 7.68   | 4 |
| 63 | W <sub>2</sub> N <sub>3</sub>                                                       | 1.89  | 1.71 | 9.47 | 13.07  | 4 |
| 64 | Ti <sub>3</sub> C <sub>2</sub> MXene nanoribbons                                    | 2.27  | 0.74 | 2.5  | 5.51   | 4 |
| 65 | Cu@Ce-MOF-2                                                                         | 5.92  | 1.61 | 9.57 | 17.1   | 5 |
| 66 | Co3Fe-MOF                                                                           | 6.5   | 3.28 | 0.5  | 10.28  | 5 |
| 67 | Au nanorods                                                                         | 0.67  | 0.83 | 9.93 | 11.43  | 3 |
| 68 | γ-Fe <sub>2</sub> O <sub>3</sub>                                                    | 0.5   | 0.61 | 10   | 11.11  | 3 |
| 69 | NeS-doped Ti <sub>3</sub> C <sub>2</sub> Tx                                         | 4.64  | 1.14 | 8.11 | 13.89  | 4 |
| 70 | N-doped porous carbon                                                               | 3.37  | 0.55 | 8.92 | 12.84  | 3 |
| 71 | CNT@CAU-17                                                                          | 2.09  | 3.92 | 6.21 | 12.22  | 5 |
| 72 | Co-TCPP                                                                             | 2.86  | 1.69 | 9.78 | 14.33  | 5 |
| 73 | Zn-TCPP                                                                             | 6.52  | 1.11 | 6.95 | 14.58  | 5 |
| 74 | NiFe-MOF                                                                            | 1.55  | 1.69 | 6.95 | 10.19  | 5 |
| 75 | NCNT@CAU-17                                                                         | 0.93  | 2.64 | 9.66 | 13.23  | 5 |
| 76 | CNT@UIO-66                                                                          | 1.22  | 2.1  | 9.66 | 12.98  | 5 |
| 77 | NCNT@UIO-66                                                                         | 0.97  | 2.44 | 8.24 | 11.65  | 5 |
| 78 | CNT@BIT-58                                                                          | 1.47  | 1.79 | 8.24 | 11.5   | 5 |
| 79 | NCNT@BIT-58                                                                         | 1.14  | 2.08 | 1.84 | 5.06   | 5 |
| 80 | NCNT@MIL-101(Fe)                                                                    | 1.32  | 3.23 | 1.84 | 6.39   | 5 |
| 81 | CNT@MIL-101(Fe)                                                                     | 3.6   | 4.6  | 8.29 | 16.49  | 5 |
| 82 | TiO <sub>2</sub> /Ti                                                                | 0.979 | 0.98 | 9.92 | 11.879 | 3 |
| 83 | MoS <sub>2</sub> /CC                                                                | 0.92  | 0.69 | 9.82 | 11.43  | 3 |
| 84 | MnO/TM                                                                              | 1.08  | 2.18 | 10   | 13.26  | 4 |
| 85 | Fe <sub>3</sub> O <sub>4</sub> /Ti                                                  | 0.5   | 1    | 9.91 | 11.41  | 3 |

|     |                                                       |      |      |      |       |   |
|-----|-------------------------------------------------------|------|------|------|-------|---|
| 86  | <b>a-Mo<sub>2</sub>C</b>                              | 10   | 9.12 | 9.94 | 29.06 | 4 |
| 87  | <b>TiN-PE</b>                                         | 2.24 | 2.4  | 9.61 | 14.25 | 4 |
| 88  | <b>ZIF-67@Ti<sub>3</sub>C<sub>2</sub></b>             | 10   | 4.8  | 2.13 | 16.93 | 5 |
| 89  | <b>In-MOF</b>                                         | 1.86 | 3.69 | 8.6  | 14.15 | 5 |
| 90  | <b>H-KUST</b>                                         | 0.89 | 0.97 | 5.25 | 7.11  | 5 |
| 91  | <b>MoO<sub>3</sub> nanosheet</b>                      | 3.01 | 0.85 | 9.52 | 13.38 | 3 |
| 92  | <b>Mo nanofilm</b>                                    | 0.7  | 0.59 | 9.88 | 11.17 | 3 |
| 93  | <b>Ru/C</b>                                           | 0.51 | 0.5  | 9.52 | 10.53 | 3 |
| 94  | <b>VN/TM</b>                                          | 0.93 | 0.92 | 8.91 | 10.76 | 3 |
| 95  | <b>Ag nanosheet</b>                                   | 0.74 | 1.48 | 9.86 | 12.08 | 3 |
| 96  | <b>MoN</b>                                            | 0.51 | 0.68 | 7.64 | 8.83  | 3 |
| 97  | <b>MoN NA/CC</b>                                      | 2.07 | 0.68 | 0.76 | 3.51  | 4 |
| 98  | <b>TiB<sub>2</sub></b>                                | 1.41 | 2.91 | 9.88 | 14.2  | 4 |
| 99  | <b>VN/CC</b>                                          | 1.79 | 1.21 | 6.75 | 9.75  | 4 |
| 100 | <b>MV-MoN@NC</b>                                      | 7.08 | 1.93 | 0.5  | 9.51  | 4 |
| 101 | <b>Mo<sub>2</sub>N</b>                                | 2.91 | 1.41 | 9.85 | 14.17 | 4 |
| 102 | <b>PEBCD/C</b>                                        | 0.63 | 1.05 | 9.6  | 11.28 | 3 |
| 103 | <b>AuHNCs</b>                                         | 0.83 | 0.5  | 8.3  | 9.63  | 3 |
| 104 | <b>Surface-engineered Ti<sub>3</sub>C<sub>2</sub></b> | 0.64 | 1.96 | 4.24 | 6.84  | 4 |
| 105 | <b>NH<sub>2</sub>-MIL-88B-Fe</b>                      | 1.13 | 3.14 | 0.5  | 4.77  | 3 |
| 106 | <b>Au nanorod</b>                                     | 0.51 | 1.3  | 9    | 10.81 | 3 |
| 107 | <b>Ru/Ti</b>                                          | 1.12 |      | 8.7  | 9.82  | 3 |
| 108 | <b>VN</b>                                             | 2.23 | 1.74 | 8.93 | 12.9  | 4 |
| 109 | <b>Cu/Ti<sub>3</sub>C<sub>2</sub>Tx MXene</b>         | 10   | 2.02 | 8.43 | 20.45 | 4 |
| 110 | <b>Ag-Au@ZIF</b>                                      | 0.55 | 4.35 | 7.75 | 12.65 | 5 |
| 111 | <b>CrO<sub>0.66</sub>N<sub>0.56</sub></b>             | 0.96 | 1.93 | 7.5  | 10.39 | 4 |
| 112 | <b>Au@ZIF-8</b>                                       | 2.96 | 10   | 6.6  | 19.56 | 5 |
| 113 | <b>Fe<sub>2</sub>O<sub>3</sub>-CNT</b>                | 0.51 | 0.47 | 0.5  | 1.48  | 3 |
| 114 | <b>CP<sub>2</sub>TiCl<sub>2</sub></b>                 | 5.48 | 0.48 | 9.86 | 15.82 | 3 |
| 115 | <b>Fe-BiOBr nanosheet (1)</b>                         | 6.36 | 0.44 | 9.99 | 16.79 | 6 |
| 116 | <b>Fe-BiOCl nanosheet (2)</b>                         | 8.4  | 2.67 | 9.99 | 21.06 | 6 |
| 117 | <b>Bi<sub>5</sub>O<sub>7</sub>Br nanotube</b>         | 8.16 | 3.29 | 9.99 | 21.44 | 6 |
| 118 | <b>Bi<sub>2</sub>MoO<sub>6</sub> sphere</b>           | 8.17 | 1.34 | 9.98 | 19.49 | 6 |
| 119 | <b>CuCr-LDH nanosheet</b>                             | 2.41 | 0.98 | 9.98 | 13.37 | 6 |

|         |                                                                                       |      |      |      |       |   |
|---------|---------------------------------------------------------------------------------------|------|------|------|-------|---|
| 12<br>0 | <b>MoO<sub>3</sub>-x nanosheet</b>                                                    | 6.11 | 0.82 | 9.51 | 16.44 | 6 |
| 12<br>1 | <b>Ti<sub>3</sub>C<sub>2</sub>T<sub>x</sub>/TiO<sub>2</sub></b>                       | 6.49 | 0.5  | 9.6  | 16.59 | 6 |
| 12<br>2 | <b>WO<sub>3</sub></b>                                                                 | 4.09 | 0.59 | 9.98 | 14.66 | 6 |
| 12<br>3 | <b>P-C<sub>3</sub>N<sub>4</sub></b>                                                   | 1.6  | 1.68 | 10   | 13.28 | 6 |
| 12<br>4 | <b>Au-Ru<sub>0-31</sub><br/>Nanokristalle</b>                                         | 3.43 | 0.7  | 7.83 | 11.96 | 6 |
| 12<br>5 | <b>Mo-W<sub>18</sub>O<sub>49</sub> Ultrathin<br/>Nanowires</b>                        | 5.16 | 0.85 | 9.94 | 15.95 | 6 |
| 12<br>6 | <b>Au/TiO<sub>2</sub>-OV</b>                                                          | 4.54 | 1.46 | 9.72 | 15.72 | 6 |
| 12<br>7 | <b>CuCr-LDH<br/>Nanosheets</b>                                                        | 2.79 | 0.56 | 9.98 | 13.33 | 6 |
| 12<br>8 | <b>SAFe-porous g-C<sub>3</sub>N<sub>4</sub></b>                                       | 2.51 | 0.56 | 9.95 | 13.02 | 7 |
| 12<br>9 | <b>Co-doped Bi<sub>2</sub>MoO<sub>6</sub></b>                                         | 3.37 | 1.7  | 9.37 | 14.44 | 7 |
| 13<br>0 | <b>Fe/Zr-MOFs</b>                                                                     | 2.27 | 1.13 | 9.39 | 12.79 | 7 |
| 13<br>1 | <b>COFX Au</b>                                                                        | 6.66 | 0.8  | 9.33 | 16.79 | 6 |
| 13<br>2 | <b>Ru/MOF/C<sub>3</sub>N<sub>4</sub></b>                                              | 9.99 | 10   | 8.42 | 28.41 | 6 |
| 13<br>3 | <b>PCN-V</b>                                                                          | 0.88 | 1.68 | 9.98 | 12.54 | 6 |
| 13<br>4 | <b>IN2S3-X@ZnS</b>                                                                    | 2.53 | 0.57 | 9.63 | 12.73 | 6 |
| 13<br>5 | <b>Ag-Pt/TiO<sub>2</sub></b>                                                          | 1.87 | 0.59 | 9.69 | 12.15 | 6 |
| 13<br>6 | <b>POM(PMo10V2) and<br/>MOF(MIL-88-A)</b>                                             | 2.3  | 0.8  | 9.94 | 13.04 | 6 |
| 13<br>7 | <b>CEF3/LiNbO<sub>3</sub></b>                                                         | 2.94 | 0.82 | 9.66 | 13.42 | 6 |
| 13<br>8 | <b>Ru-KzTa<sub>2</sub>O<sub>6</sub>-x</b>                                             | 1.24 | 1.38 | 8.44 | 11.06 | 6 |
| 13<br>9 | <b>C<sub>3</sub>N<sub>4</sub>/MoS<sub>2</sub>/Mn<sub>3</sub>O<sub>4</sub><br/>SVs</b> | 5.03 | 1.93 | 9.71 | 16.67 | 6 |
| 14<br>0 | <b>B-C<sub>3</sub>N<sub>4</sub> (MoO<sub>2</sub>)</b>                                 | 8.2  | 1.21 | 9.97 | 19.38 | 6 |
| 14<br>1 | <b>Au/TiO<sub>2</sub></b>                                                             | 2.96 | 1.46 | 9.72 | 14.14 | 6 |
| 14<br>2 | <b>Au/g-C<sub>3</sub>N<sub>4</sub> hollow<br/>sphere</b>                              | 6.45 | 1.23 | 9.64 | 17.32 | 6 |
| 14<br>3 | <b>Ru-CoS/g-C<sub>3</sub>N<sub>4</sub> SVs</b>                                        | 6.53 | 2.02 | 9.59 | 18.14 | 6 |
| 14<br>4 | <b>BiOBr nanosheet (1)</b>                                                            | 2.44 | n/a  | 9.99 | 12.43 | 6 |
| 14<br>5 | <b>Bi<sub>5</sub>O<sub>7</sub>Br<br/>nanostructure</b>                                | 10   | n/a  | 9.99 | 19.99 | 6 |
| 14<br>6 | <b>Bi<sub>2</sub>MoO<sub>6</sub>/BiOBr</b>                                            | 3.3  | n/a  | 9.97 | 13.27 | 6 |
| 14<br>7 | <b>H-Bi<sub>5</sub>O<sub>7</sub>I</b>                                                 | 5.5  | n/a  | 9.98 | 15.48 | 6 |
| 14<br>8 | <b>Cu<sup>δ+</sup>-ZnAl-LDH<br/>nanosheet</b>                                         | 3.46 | n/a  | 9.98 | 13.44 | 6 |
| 14<br>9 | <b>FeS<sub>2</sub>-FeP-CeO<sub>2</sub></b>                                            | 9.65 | n/a  | 9.96 | 19.61 | 6 |
| 15<br>0 | <b>In<sub>2</sub>O<sub>3</sub>/In<sub>2</sub>S<sub>3</sub><br/>microsphere</b>        | 2.08 | n/a  | 9.53 | 11.61 | 6 |
| 15<br>1 | <b>GaN (Ru) NVs</b>                                                                   | 6.52 | n/a  | 8.5  | 15.02 | 6 |
| 15<br>2 | <b>Ultrathin MoS<sub>2</sub> SVs</b>                                                  | 6.06 | n/a  | 9.97 | 16.03 | 6 |
| 15<br>3 | <b>FeN-CDs/TiO<sub>2</sub>@CN</b>                                                     | 6.35 | n/a  | 9.99 | 16.34 | 7 |

|     |                                                                     |      |     |      |       |   |
|-----|---------------------------------------------------------------------|------|-----|------|-------|---|
| 154 | Al-PMOF(Fe)                                                         | 0.5  | n/a | 9.98 | 10.48 | 7 |
| 155 | Pt <sub>1</sub> /N-MoS <sub>2</sub>                                 | 3.88 | n/a | 3.26 | 7.14  | 7 |
| 156 | Fe-BiOCl Nanosheets                                                 | 8.4  | n/a | 9.96 | 18.36 | 7 |
| 157 | Au/(BiO) <sub>2</sub> CO <sub>3</sub>                               | 2.03 | n/a | 9.64 | 11.67 | 7 |
| 158 | 5%Ru@n-GaN NWs                                                      | 3.86 | n/a | 8.3  | 12.16 | 7 |
| 159 | Cs <sub>2</sub> O/Os-Au                                             | 9.61 | n/a | 0.5  | 10.11 | 7 |
| 160 | UiO-66(-NH <sub>2</sub> )/CuInS <sub>2</sub>                        | 7.08 | n/a | 6    | 13.08 | 7 |
| 161 | FeIn <sub>2</sub> S <sub>4</sub> /Fe-Pal                            | 7.56 | n/a | 9.55 | 17.11 | 7 |
| 162 | Bi <sub>2</sub> S <sub>3</sub> /OV-Bi <sub>2</sub> MoO <sub>6</sub> | 3.91 | n/a | 9.96 | 13.87 | 7 |
| 163 | Cu-Cu <sub>2</sub> O/CMOH                                           | 5.47 | n/a | 9.78 | 15.25 | 7 |
| 164 | Co-doped Bi <sub>2</sub> MoO <sub>6</sub> (1)                       | 4.53 | n/a | 9.37 | 13.9  | 7 |
| 165 | Cu-doped Bi <sub>2</sub> MoO <sub>6</sub> (2)                       | 5.63 | n/a | 9.37 | 15    | 7 |
| 166 | Bi-MOF/g-C <sub>3</sub> N <sub>4</sub>                              | 5.45 | n/a | 9.99 | 15.44 | 7 |
| 167 | Cu <sub>2</sub> O Clusters/MIL-100(Fe)                              | 2.33 | n/a | 9.93 | 12.26 | 7 |
| 168 | BiOBr/OV-TiO <sub>2</sub> -Cu                                       | 5.05 | n/a | 9.96 | 15.01 | 7 |
| 169 | S-doped-g-C <sub>3</sub> N <sub>4</sub>                             | 9.93 | n/a | 10   | 19.93 | 7 |
| 170 | Carbon-WO <sub>3</sub> -H <sub>2</sub> O                            | 5.56 | n/a | 9.98 | 15.54 | 7 |
| 171 | ZnO/ZnSnO <sub>3</sub> /Carbon Dots                                 | 9.74 | n/a | 9.99 | 19.73 | 7 |
| 172 | TiO <sub>2</sub> /BiOBr                                             | 8.11 | n/a | 9.99 | 18.1  | 7 |
| 173 | Bi <sub>2</sub> SN <sub>2</sub> O <sub>7</sub> /BiOBr               | 6.59 | n/a | 9.98 | 16.57 | 7 |
| 174 | Boron-doped graphene quantum dots/Bi <sub>2</sub> MoO <sub>6</sub>  | 5.48 | n/a | 9.36 | 14.84 | 7 |
| 175 | 2D/2D Bi <sub>12</sub> O <sub>17</sub> Br <sub>2</sub> /ZnCr-LDH    | 6.2  | n/a | 0.85 | 7.05  | 7 |
| 176 | N-graphyne/Bi/BiOBr                                                 | 1.61 | n/a | 9.87 | 11.48 | 7 |
| 177 | p-TiO <sub>2</sub>                                                  | 2.63 | n/a | 10   | 12.63 | 7 |
| 178 | Bi <sub>2</sub> S <sub>3</sub> @PCN                                 | 1.08 | n/a | 9.98 | 11.06 | 7 |
| 179 | NanoMIL-125(Ti)                                                     | 5.46 | n/a | 10   | 15.46 | 7 |
| 180 | COF/g-C <sub>3</sub> N <sub>4</sub> /CNT                            | 5.21 | n/a | 9.51 | 14.72 | 7 |
| 181 | NiSnO <sub>3</sub> -g-C <sub>3</sub> N <sub>4</sub>                 | 7.47 | n/a | 9.93 | 17.4  | 7 |
| 182 | Sb/TiO <sub>2</sub>                                                 | 1.33 | n/a | 9.99 | 11.32 | 6 |
| 183 | Few-layer g-C <sub>3</sub> N <sub>4</sub> NVs                       | 9.97 | n/a | 10   | 19.97 | 6 |
| 184 | NC-g-C <sub>3</sub> N <sub>4</sub>                                  | 8.22 | n/a | 10   | 18.22 | 6 |
| 185 | MOF-74(Zn)@DF-C <sub>3</sub> N <sub>4</sub>                         | 8.35 | n/a | 9.99 | 18.34 | 6 |
| 186 | S-g-C <sub>3</sub> N <sub>4</sub> nanosheet CVs                     | 9.93 | n/a | 9.99 | 19.92 | 6 |

|     |                                         |      |     |      |       |   |
|-----|-----------------------------------------|------|-----|------|-------|---|
| 187 | <b>WS2@TiO2 film</b>                    | 8.18 | n/a | 9.92 | 18.1  | 6 |
| 188 | <b>B-g-C3N4 Nanosheet</b>               | 6.35 | n/a | 9.98 | 16.33 | 6 |
| 189 | <b>B-g-C3N4</b>                         | 6.5  | n/a | 9.98 | 16.48 | 6 |
| 190 | <b>YF3+/ATP nanocomposite</b>           | 2.12 | n/a | 9.65 | 11.77 | 6 |
| 191 | <b>In(OH)3/g-C3N4</b>                   | 9.58 | n/a | 9.65 | 19.23 | 6 |
| 192 | <b>Fe-SrMoO4</b>                        | 3.4  | n/a | 9.93 | 13.33 | 6 |
| 193 | <b>Cyano group/g-C3N4</b>               | 9.49 | n/a | 9.99 | 19.48 | 6 |
| 194 | <b>In2S3 nanotube SVs</b>               | 2.36 | n/a | 9.48 | 11.84 | 6 |
| 195 | <b>Pr3+: CeF3/ATP (attapulgitite)</b>   | 7.55 | n/a | 9.82 | 17.37 | 6 |
| 196 | <b>AuRuNPs</b>                          | 3.43 | n/a | 6.96 | 10.39 | 6 |
| 197 | <b>Bi2O2CO3 nanosheet</b>               | 4.67 | n/a | 9.96 | 14.63 | 6 |
| 198 | <b>TiO2 nanotubular</b>                 | 7.29 | n/a | 9.98 | 17.27 | 6 |
| 199 | <b>O-g-C3N4 NVs</b>                     | 9.88 | n/a | 10   | 19.88 | 6 |
| 200 | <b>S-g-C3N4 NVs</b>                     | 3.14 | n/a | 10   | 13.14 | 6 |
| 201 | <b>1T-MoS2/CdS SVs</b>                  | 10   | n/a | 8.74 | 18.74 | 6 |
| 202 | <b>Mo0.1Ni0.1Cd0.8S SVs</b>             | 2.72 | n/a | 7.79 | 10.51 | 6 |
| 203 | <b>Zn0.1Sn0.1Cd0.8S SVs</b>             | 3    | n/a | 6.4  | 9.4   | 6 |
| 204 | <b>Holey g-C3N4 nanosheet CVs</b>       | 6.41 | n/a | 9.74 | 16.15 | 6 |
| 205 | <b>g-C3N4/ZnMoCdS SVs</b>               | 2.87 | n/a | 8.47 | 11.34 | 6 |
| 206 | <b>Sn-doped MOF-5</b>                   | 5.13 | n/a | 9.81 | 14.94 | 7 |
| 207 | <b>TiO2 QDs/ Fe3S4</b>                  | 9.36 | n/a | 9.93 | 19.29 | 7 |
| 208 | <b>g-C3N4/rGO</b>                       | 4.57 | n/a | 7.38 | 11.95 | 7 |
| 209 | <b>Bi2O3/CdMoO4</b>                     | 3.33 | n/a | 8.11 | 11.44 | 7 |
| 210 | <b>g-C3N4/MoS2/PbTiO3</b>               | 9.72 | n/a | 8.97 | 18.69 | 7 |
| 211 | <b>NaNbO3/Bi2O2CO3</b>                  | 4.13 | n/a | 7.85 | 11.98 | 7 |
| 212 | <b>TiO2 QDsmodified Bi2O3/NaBiS2</b>    | 7.12 | n/a | 9.77 | 16.89 | 7 |
| 213 | <b>TCN/ZnS/ZnIn2S4</b>                  | 7.04 | n/a | 0.5  | 7.54  | 7 |
| 214 | <b>Ag-δ-Bi2O3</b>                       | 0.5  | n/a | 7.69 | 8.19  | 7 |
| 215 | <b>g-C3N4/Ag2CO3 heterojunction NVs</b> | 4.77 | n/a | 8    | 12.77 | 7 |

## S2. Machine Learning Analysis

The Supplementary Information includes the Silhouette plots, Elbow plots, and a parallel coordinates plot that were used to guide the machine learning clustering procedure. The Silhouette and Elbow plots were applied to quantitatively evaluate cluster cohesion and separation, enabling the identification of the optimal number of clusters. The parallel coordinates plot provides a complementary visualization of the

multidimensional relationships among the catalytic systems and their performance metrics. Together, these analyses document the methodological steps leading to the final clustering solution and support a clear and transparent interpretation of the machine learning outcomes.

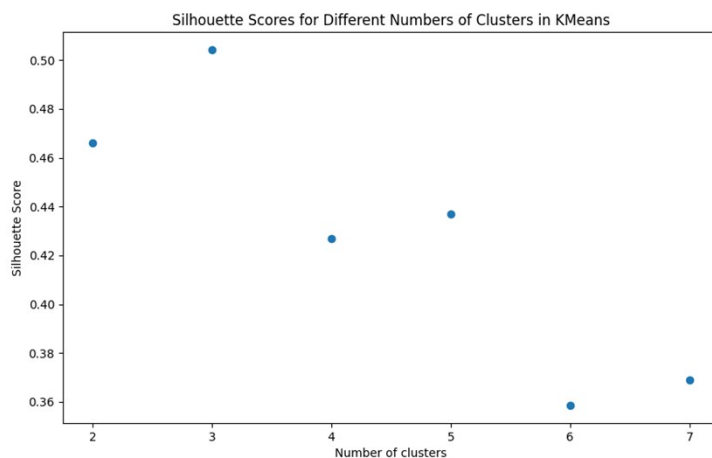

**Figure S1:** Silhouette Scores for different numbers of Clusters

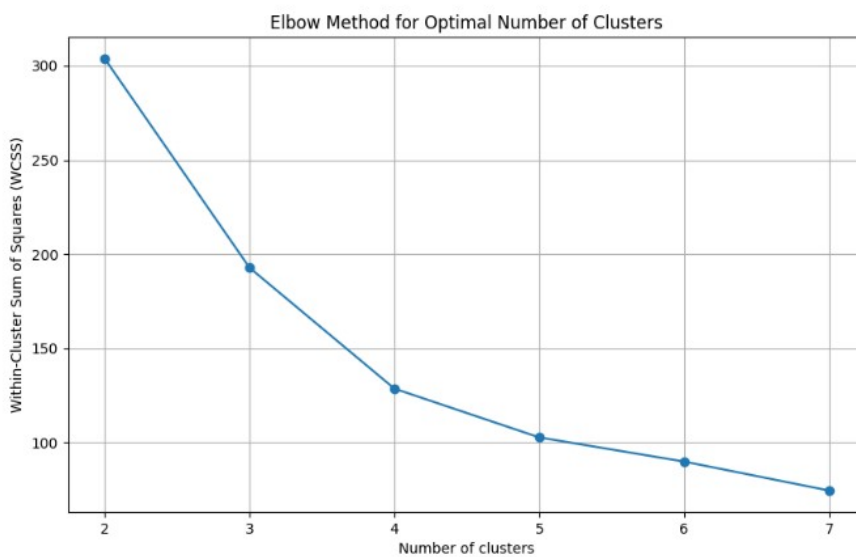

**Figure S2:** Elbow Method for Determining the Optimal Number of Clusters

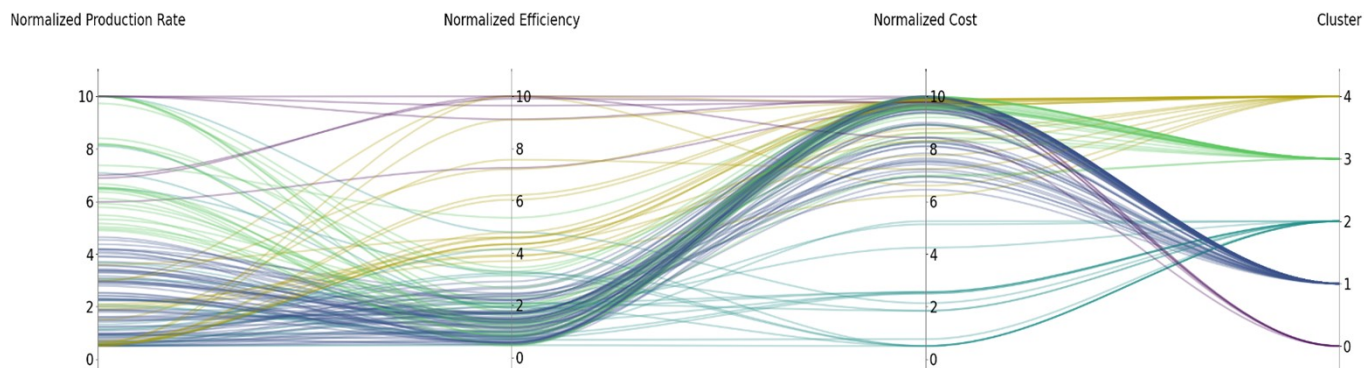

**Figure S3:** Visualization of Catalytic Systems Using Parallel Coordinates Plot.

## References

1. Ahmed MI, Assafiri A, Hibbert DB, Zhao C. Li-Mediated Electrochemical Nitrogen Fixation: Key Advances and Future Perspectives. *Small*. 2023;19(52). doi:10.1002/sml.202305616
2. Mangini A, Fagiolari L, Sacchetti A, Garbujo A, Biasi P, Bella F. Lithium-Mediated Nitrogen Reduction for Ammonia Synthesis: Reviewing the Gap between Continuous Electrolytic Cells and Stepwise Processes through Galvanic Li–N<sub>2</sub> Cells. *Adv Energy Mater*. 2024;14(25). doi:10.1002/aenm.202400076
3. Mahmood S, Iqbal S, Wang Z, et al. Emerging electrocatalysts for green ammonia production: Recent progress and future outlook. *Arabian Journal of Chemistry. Elsevier B.V.* 2024;17(10). doi:10.1016/j.arabjc.2024.105950
4. Biswas A, Bhardwaj S, Boruah T, Dey RS. Electrochemical ammonia synthesis: fundamental practices and recent developments in transition metal boride, carbide and nitride-class of catalysts. *Mater Adv*. 2022;3(13):5207-5233. doi:10.1039/D2MA00279E
5. He H, Wen HM, Li HK, Zhang HW. Recent advances in metal–organic frameworks and their derivatives for electrocatalytic nitrogen reduction to ammonia. *Coord Chem Rev*. 2022;471:214761. doi:10.1016/j.ccr.2022.214761
6. Shen H, Yang M, Hao L, Wang J, Strunk J, Sun Z. Photocatalytic nitrogen reduction to ammonia: Insights into the role of defect engineering in photocatalysts. *Nano Res*. 2022;15(4):2773-2809. doi:10.1007/s12274-021-3725-0
7. Ješić D, Pomeroy B, Kamal KM, Kovačić Ž, Huš M, Likozar B. Photo- and Photoelectrocatalysis in Nitrogen Reduction Reactions to Ammonia: Interfaces, Mechanisms, and Modeling Simulations. *Advanced Energy and Sustainability Research*. Published online June 16, 2024. doi:10.1002/aesr.202400083
